# Supplementary material for: Peppers: A “Hot” Natural Source for Antitumor Compounds
Source: PubMed Central journal article supplement (PMC8002096; doi:10.3390/molecules26061521), 2021-03-10
Supplement: molecules-26-01521-s001.pdf [file molecules-26-01521-s001.pdf]

## Supporting Information

# Peppers: A "Hot" Natural Source for Antitumor Compounds

Micael Rodrigues Cunha <sup>1,3</sup>, Maurício Temotheo Tavares <sup>2,3</sup>, Thais Batista Fernandes <sup>3</sup> and Roberto Parise-Filho <sup>3\*</sup>

<sup>1</sup> Center of Medicinal Chemistry, Dr. André Tosello Avenue, 550, 13083-886 Campinas - SP, Brazil; micaelrc@unicamp.br

<sup>2</sup> Department of Molecular Medicine, The Scripps Research Institute, Jupiter, FL 33458, United States; mttavares@scripps.edu

<sup>3</sup> Laboratory of Design and Synthesis of Bioactive Substances, Department of Pharmacy, University of São Paulo, Prof. Lineu Prestes Avenue 580, Bl.13, 05508-900 Butantã - SP, Brazil; thaisbf@alumni.usp.br

\* Correspondence: roberto.parise@usp.br; Tel.: +55-11-3091-3687

**Table 1.** Description of cancer cell lines from table 1.

| Cell line | Species             | Disease                                                  |
|-----------|---------------------|----------------------------------------------------------|
| 3T3-A31   | <i>Mus musculus</i> | fibroblast, normal                                       |
| 518A2     | <i>Homo sapiens</i> | melanoma                                                 |
| 786-0     | <i>Homo sapiens</i> | renal adenocarcinoma                                     |
| A2058     | <i>Homo sapiens</i> | melanoma                                                 |
| A2780     | <i>Homo sapiens</i> | ovarian carcinoma                                        |
| A375      | <i>Homo sapiens</i> | malignant melanoma                                       |
| A549      | <i>Homo sapiens</i> | lung adenocarcinoma                                      |
| ACC-2     | <i>Homo sapiens</i> | human papillomavirus-related endocervical adenocarcinoma |
| AsPC1     | <i>Homo sapiens</i> | pancreas adenocarcinoma                                  |
| B16F10    | <i>Mus musculus</i> | melanoma                                                 |
| BxPC3     | <i>Homo sapiens</i> | pancreas adenocarcinoma                                  |
| CaCo-2    | <i>Homo sapiens</i> | colorectal adenocarcinoma                                |
| Cal-27    | <i>Homo sapiens</i> | squamous cell carcinoma                                  |
| CaSKi     | <i>Homo sapiens</i> | epidermoid carcinoma                                     |
| CCD-18Co  | <i>Homo sapiens</i> | fibroblast, normal                                       |
| CEM       | <i>Homo sapiens</i> | acute lymphoblastic leukemia                             |
| CNE       | <i>Homo sapiens</i> | nasopharyngeal carcinoma                                 |
| COLO-205  | <i>Homo sapiens</i> | Dukes' type D, colorectal adenocarcinoma                 |
| DU-145    | <i>Homo sapiens</i> | prostate carcinoma                                       |
| EAT       | <i>Mus musculus</i> | breast adenocarcinoma                                    |
| EJ        | <i>Homo sapiens</i> | endometrial adenocarcinoma                               |
| GBM10     | <i>Homo sapiens</i> | glioblastoma                                             |
| H460      | <i>Homo sapiens</i> | large cell lung carcinoma                                |
| HaCaT     | <i>Homo sapiens</i> | immortalized skin keratinocytes                          |
| HCT116    | <i>Homo sapiens</i> | colorectal carcinoma                                     |
| HCT15     | <i>Homo sapiens</i> | Dukes' type C, colorectal adenocarcinoma                 |
| HCT8      | <i>Homo sapiens</i> | ileocecal colorectal adenocarcinoma                      |
| HeLa      | <i>Homo sapiens</i> | epithelial adenocarcinoma                                |
| HepG2     | <i>Homo sapiens</i> | hepatocellular carcinoma                                 |
| HL60      | <i>Homo sapiens</i> | acute myeloid leukemia                                   |

|            |                           |                                                          |
|------------|---------------------------|----------------------------------------------------------|
| HSC-3      | <i>Homo sapiens</i>       | tongue squamous carcinoma                                |
| HT1080     | <i>Homo sapiens</i>       | fibrosarcoma                                             |
| HT-29      | <i>Homo sapiens</i>       | colorectal adenocarcinoma                                |
| HuH7       | <i>Homo sapiens</i>       | hepatocellular carcinoma                                 |
| IMR-32     | <i>Homo sapiens</i>       | neuroblastoma                                            |
| JURKAT     | <i>Homo sapiens</i>       | acute T cell leukemia                                    |
| K-562      | <i>Homo sapiens</i>       | chronic myelogenous leukemia                             |
| KB         | <i>Homo sapiens</i>       | carcinoma                                                |
| L-02       | <i>Homo sapiens</i>       | immortalized fetal hepatocyte                            |
| L1210      | <i>Mus musculus</i>       | lymphocytic leukemia                                     |
| L5178Y     | <i>Mus musculus</i>       | lymphoma                                                 |
| LAPC4      | <i>Homo sapiens</i>       | prostate carcinoma                                       |
| LNCaP      | <i>Homo sapiens</i>       | prostate adenocarcinoma                                  |
| MCF-10A    | <i>Homo sapiens</i>       | epithelial breast, normal                                |
| MCF-12A    | <i>Homo sapiens</i>       | immortalized epithelial breast                           |
| MCF-7      | <i>Homo sapiens</i>       | breast adenocarcinoma                                    |
| MDA-MB-231 | <i>Homo sapiens</i>       | breast metastatic adenocarcinoma                         |
| MDA-MB-468 | <i>Homo sapiens</i>       | breast metastatic adenocarcinoma                         |
| MOLT-4     | <i>Homo sapiens</i>       | acute lymphoblastic leukemia                             |
| MRC-5      | <i>Homo sapiens</i>       | lung, normal                                             |
| NCI-H460   | <i>Homo sapiens</i>       | large cell lung carcinoma                                |
| NCI-H727   | <i>Homo sapiens</i>       | lung carcinoid                                           |
| OVCAR-3    | <i>Homo sapiens</i>       | ovary adenocarcinoma                                     |
| P-388      | <i>Mus musculus</i>       | lymphoma                                                 |
| PC-3       | <i>Homo sapiens</i>       | grade IV, prostate adenocarcinoma                        |
| RL         | <i>Homo sapiens</i>       | non-Hodgkin's lymphoma                                   |
| RT-4       | <i>Homo sapiens</i>       | urinary bladder transitional cell papilloma              |
| SF188      | <i>Homo sapiens</i>       | glioblastoma                                             |
| SGC-7901   | <i>Homo sapiens</i>       | human papillomavirus-related endocervical adenocarcinoma |
| SKBR3      | <i>Homo sapiens</i>       | breast metastatic adenocarcinoma                         |
| SK-LMS-1   | <i>Homo sapiens</i>       | leiomyosarcoma                                           |
| SK-MEL-2   | <i>Homo sapiens</i>       | malignant melanoma                                       |
| SK-MEL-25  | <i>Homo sapiens</i>       | malignant melanoma                                       |
| SK-MEL-28  | <i>Homo sapiens</i>       | cutaneous melanoma                                       |
| SK-OV-3    | <i>Homo sapiens</i>       | ovary adenocarcinoma                                     |
| SMMC-7721  | <i>Homo sapiens</i>       | human papillomavirus-related endocervical adenocarcinoma |
| SW-480     | <i>Homo sapiens</i>       | Dukes' type B, colorectal adenocarcinoma                 |
| SW-620     | <i>Homo sapiens</i>       | Dukes' type C, colorectal adenocarcinoma                 |
| T98G       | <i>Homo sapiens</i>       | glioblastoma multiforme                                  |
| U-87       | <i>Homo sapiens</i>       | glioblastoma                                             |
| U937       | <i>Homo sapiens</i>       | histiocytic lymphoma                                     |
| UACC-62    | <i>Homo sapiens</i>       | melanoma                                                 |
| V79        | <i>Cricetulus griseus</i> | fibroblast, normal                                       |
| WI38       | <i>Homo sapiens</i>       | fibroblast, normal                                       |
| ZR-75-30   | <i>Homo sapiens</i>       | breast ductal carcinoma                                  |
